# Supplementary material for: Sodium anilinide–cyclohexylamide pair: synthesis, characterization, and hydrogen storage properties
Source: Royal Society of Chemistry journal article supplement (doi:10.1039/c9cc08593a), 2020-01-01
Supplement: c9cc08593a1.pdf [file c9cc08593a1.pdf]

*Electronic Supplementary Information (ESI) for:*

**Sodium anilide-cyclohexylamide pair: synthesis, characterization,  
and hydrogen storage properties**

Zijun Jing,<sup>ab</sup> Yang Yu,<sup>ab</sup> Ruting Chen,<sup>c</sup> Khai Chen Tan,<sup>d</sup> Teng He,<sup>\*a</sup> Anan Wu,<sup>\*c</sup> Qijun Pei,<sup>ab</sup> Yongshen Chua,<sup>d</sup> Dewen Zheng,<sup>\*e</sup> Xi Zhang,<sup>e</sup> Zhixin Ge,<sup>e</sup> Fudong Zhang,<sup>e</sup> and Ping Chen<sup>a</sup>

<sup>a.</sup> Dalian National Laboratory for Clean Energy, Dalian Institute of Chemical Physics, Chinese Academy of Sciences, Dalian 116023, China.

<sup>b.</sup> University of Chinese Academy of Sciences, Beijing 100049, China.

<sup>c.</sup> Department of Chemistry, College of Chemistry and Chemical Engineering, Xiamen University, Xiamen 361005, China.

<sup>d.</sup> School of Chemical Sciences, Universiti Sains Malaysia, Pulau Pinang 11800, Malaysia.

<sup>e.</sup> New Energy Department, Research Institute of Petroleum Exploration & Development, China National Petroleum Corporation, China

<sup>\*</sup>. Corresponding authors, e-mails: [heteng@dicp.ac.cn](mailto:heteng@dicp.ac.cn) (T.H.); [ananwu@xmu.edu.cn](mailto:ananwu@xmu.edu.cn) (A.W.); [zdw69@petrochina.com.cn](mailto:zdw69@petrochina.com.cn) (D.Z.)

## Experimental section

### Materials

Aniline (99.0%, Aladdin), cyclohexylamine (99.0%, Aladdin), sodium hydride (95%, Aldrich),  $\text{TiO}_2$  (99.8%, Aladdin),  $\text{RuCl}_3$  (47%Ru, Innochem)  $\text{Na}_2\text{CO}_3$  (AR, Kermel) diethyl ether (AR, Kermel) were used without further purification. Water was removed for ether with molecular sieve prior to use. The commercial catalysts (5%Ru/ $\text{Al}_2\text{O}_3$ , Alfa Aesar; 5%Rh/ $\text{Al}_2\text{O}_3$ , Acros; 5%Pt/C, Alfa Aesar; 5%Pd/C, Alfa Aesar) were used with pretreatment of reduction under  $\text{H}_2$  atmosphere with a flow rate of  $50 \text{ ml min}^{-1}$  at  $250^\circ\text{C}$  for 2h.

### Synthesis of sodium anilide and sodium cyclohexylamide

**Sodium anilide:** In a 60 ml autoclave, 0.01 mol aniline and 0.01 mol sodium hydride were added in 20 ml diethyl ether and stirred at a rate of 500 rpm at room temperature. The reaction process was monitored by a pressure gauge. After 40 hours, around 1 equivalent of hydrogen can be released (Figure 2a). After the solvent was removed using a reduced pressure distillation at room temperature, a light gray solid powder was obtained. Upon charactering, it is found that some diethyl ether was still adducted in the sodium anilide.

Ball milling method was conducted to synthesize solvent-free sodium anilide. In a typical synthesis, 0.01 mol aniline and 0.01 mol sodium hydride were placed into a 180 ml stainless steel vessel and mechanically milled in a Retsch PM 400 planetary ball mill. The ball-milling was carried out at a rate of 200 rpm for 10 h, where around 1 equivalent hydrogen was released.

**Sodium cyclohexylamide:** 0.01 mol cyclohexylamine and 0.01 mol sodium hydride were placed into a 180 ml stainless steel vessel and mechanically milled in a Retsch PM 400 planetary ball mill. The ball-milling was carried out at a rate of 200 rpm for 160 h, where the hydrogen released was quantified by the pressure in the ball mill jar.

### Synthesis of catalyst Na-Ru/ $\text{TiO}_2$

Na-modified 1% Ru/ $\text{TiO}_2$  (Na-Ru/ $\text{TiO}_2$ ) was prepared through conventional impregnation method. In a typical synthetic procedure, 21.3 mg  $\text{RuCl}_3$  and 1.0 g  $\text{TiO}_2$  were added in 10 mL of deionized water and stirred for 6 hours followed by evaporated at  $50^\circ\text{C}$  and dried in oven at  $100^\circ\text{C}$  for 3h. The catalyst was calcinated at  $300^\circ\text{C}$  for 4h. Then,  $\text{Na}_2\text{CO}_3$  modified 1% Ru/ $\text{TiO}_2$  catalyst was prepared by adding  $\text{Na}_2\text{CO}_3$  and 1% Ru/ $\text{TiO}_2$  (molar ration of Na to Ru is 10 to 1) in 10 mL of deionized water and was stirred for 6 hours. Then, the same drying procedures were performed. Finally, the catalyst was reduced under hydrogen flow at  $300^\circ\text{C}$  for 2h.

### Characterizations

X-ray diffraction (XRD) patterns were collected on a PANalytical X'Pert diffractometer equipped with Cu K $\alpha$  radiation at 40 kV and 40 mA. Liquid-state nuclear magnetic resonance (NMR) spectroscopies were collected on a Bruker AVANCE 500 MHz NMR spectrometer (11.7 T) at room temperature. DMSO- $\text{d}_6$  and benzene- $\text{d}_6$  were used as deuterated reagents. Thermogravimetric-differential thermal analysis (TG-DTA) were collected on a synchronous thermal analysis STA 449 F3, made by NETZSCH.

### Hydrogenation of sodium anilide

The hydrogenation of sodium anilide catalyzed with different catalysts were carried out in a high-pressure reactor. A grinding mixture of sodium anilide and catalysts by hand at a certain molar ratio was loaded into a stainless-steel reactor, then the argon gas was removed by vacuum pump followed by heated up to the desired temperature (heating rate:  $2^\circ\text{C/min}$ ). After that, 70 bar of hydrogen was charged into the reactor and the reaction was monitored using a pressure gauge. The final products were analyzed and quantified via  $^1\text{H}$  NMR and  $^{13}\text{C}$  NMR.

### Dehydrogenation of sodium cyclohexylamide

The dehydrogenation behavior of the catalyzed sodium cyclohexylamine was monitored on a homemade temperature-programmed desorption system equipped with a mass spectrometer (HPR20, Hiden) (TPD-MS). A grinding mixture of sodium cyclohexylamide (30 mg) and Rh/ $\text{Al}_2\text{O}_3$  by hand at a molar ratio of 10:1 (reactant to metal) was put into a stainless-steel reactor followed by heated up to  $300^\circ\text{C}$  at a ramping rate of  $2^\circ\text{C/min}$  under argon flow of  $50 \text{ mL min}^{-1}$ .

For the close system, the dehydrogenation of sodium cyclohexylamide was carried out in the stainless-steel reactor. The reactant with commercial catalyst was heated up to the desired temperature at a heating rate of  $1^\circ\text{C/min}$ , and then kept for a certain time. The final products were analyzed and quantified by  $^1\text{H}$  NMR and  $^{13}\text{C}$  NMR.

All the sample loadings were carried out in a glove box filled with purified argon.

### **Computational Method**

For the geometry optimization, B3LYP hybrid function was employed in connection with the all-electron basis set of 6-311+G (D, P). Analytical frequencies were calculated to confirm that a local minimum has no imaginary frequencies. Natural population analysis was performed to obtain the NBO charges. All calculations in the present study were carried out using the Gaussian09 package.

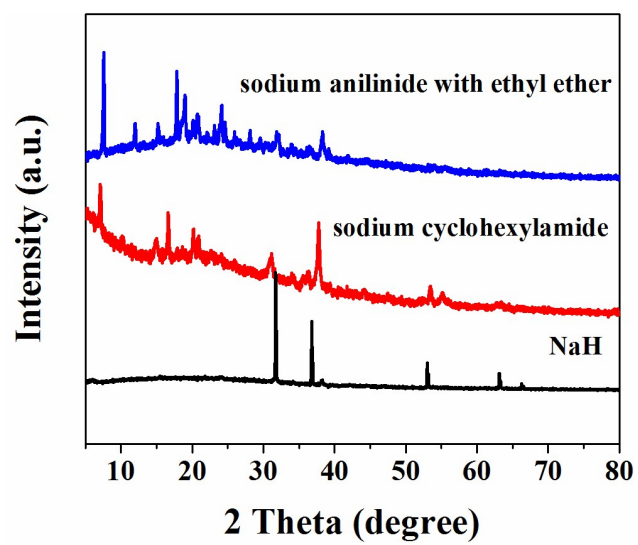

**Figure S1.** XRD patterns of synthesized sodium anilide (from diethyl ether) and sodium cyclohexylamide compared with sodium hydride.

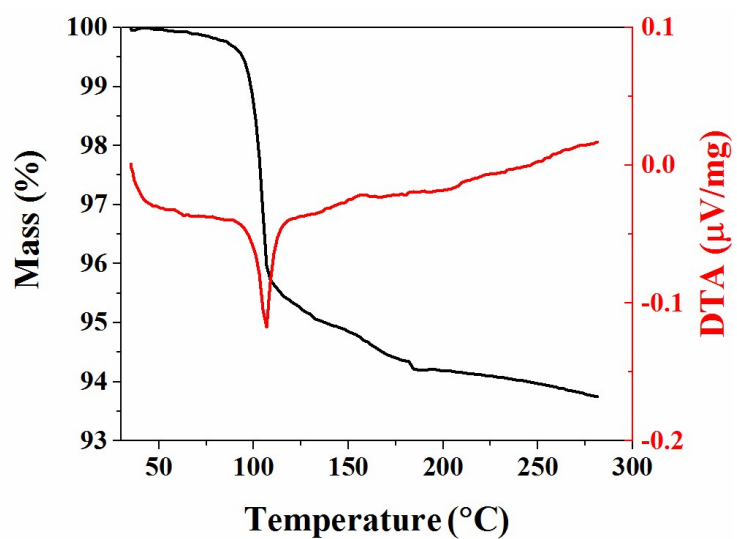

**Figure S2.** TG-DTA of synthesized sodium anilide from diethyl ether.

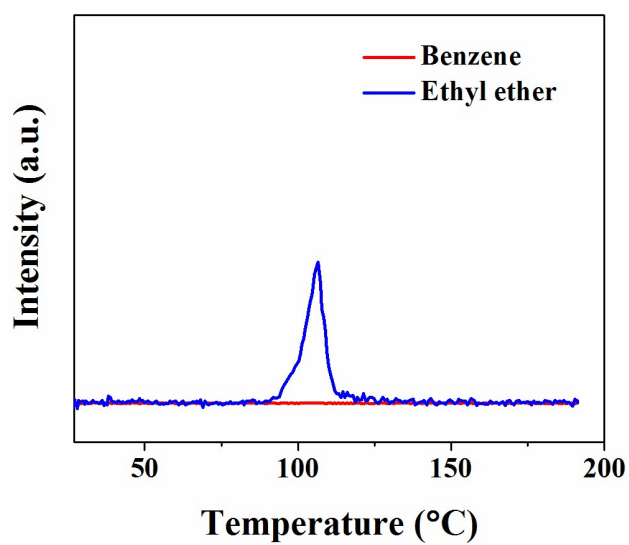

**Figure S3.** TPD-MS of synthesized sodium anilide from diethyl ether, which indicates some diethyl ether is still adducted on sodium anilide.

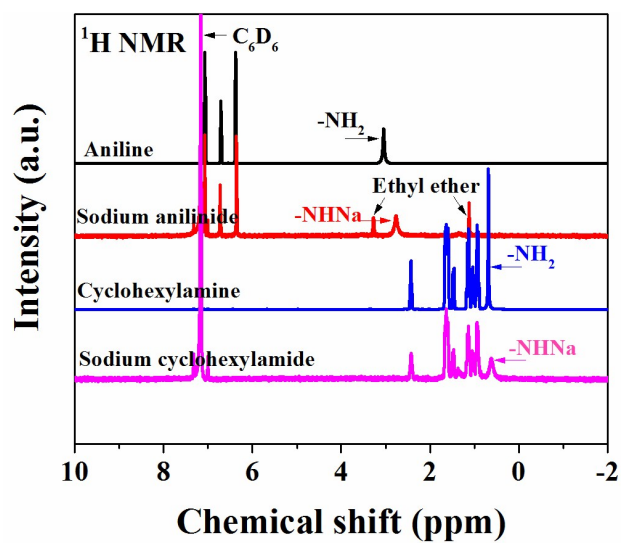

**Figure S4.**  $^1\text{H}$  NMR spectra of sodium anilide and sodium cyclohexylamide compared with those of aniline and cyclohexylamine in  $\text{C}_6\text{D}_6$ .

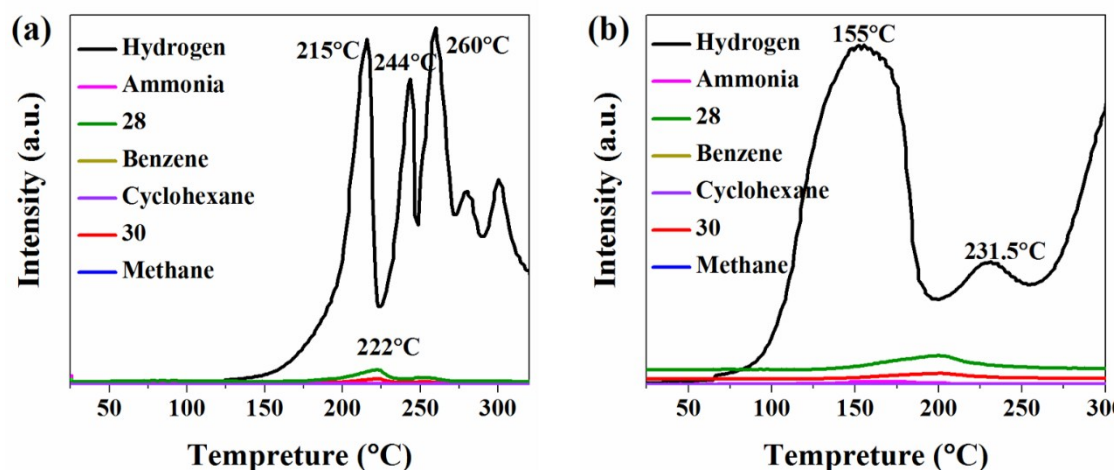

**Figure S5.** (a) TPD-MS of sodium cyclohexylamide (b) TPD-MS of sodium cyclohexylamide catalyzed by Rh/Al<sub>2</sub>O<sub>3</sub> (m/z=28 and 30 are the fragments of by-products, which may be due to the partial decomposition of sodium cyclohexylamide or other products. No other impurity was observed. The molar ratio of Rh to sodium cyclohexylamide is 1:10.).

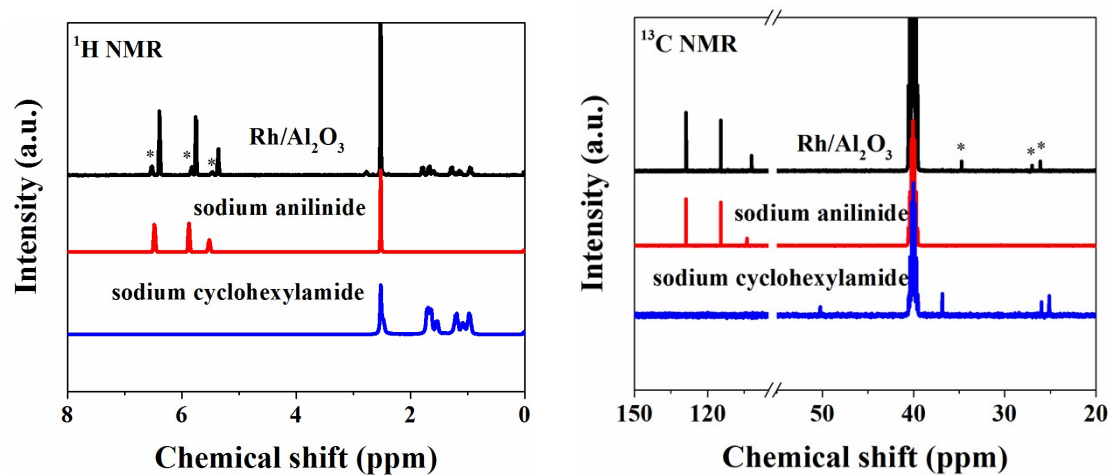

**Figure S6.**  $^1\text{H}$  NMR and  $^{13}\text{C}$  NMR spectra of dehydrogenated sodium cyclohexylamide catalyzed by 5%Rh/ $\text{Al}_2\text{O}_3$  in  $\text{DMSO-d}_6$ . (\* N-cyclohexylbenzenamine)

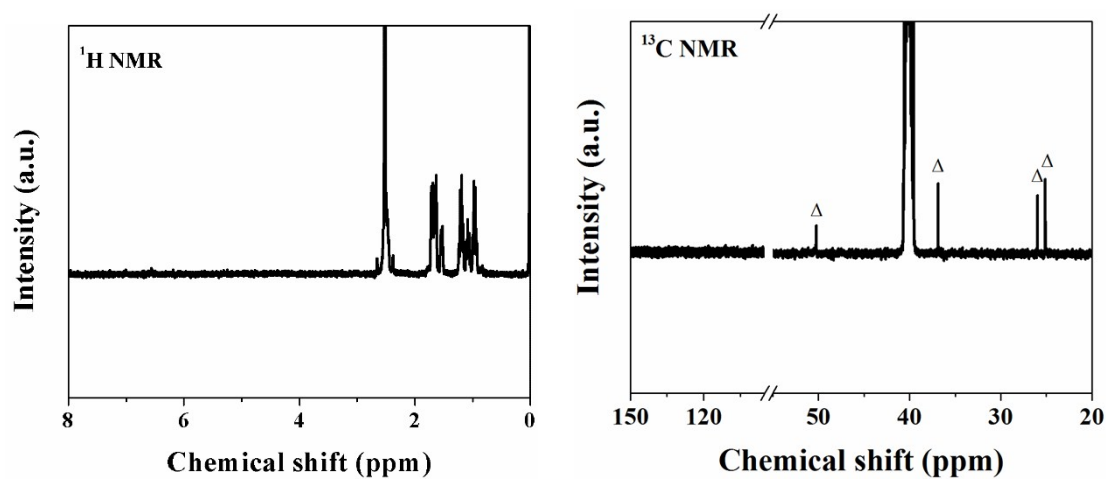

**Figure S7.**  $^1\text{H}$  NMR and  $^{13}\text{C}$  NMR spectra of hydrogenated sodium anilide in  $\text{DMSO-d}_6$ . ( $\Delta$  sodium cyclohexylamide) Hydrogenation conditions: Na-1%Ru/ $\text{TiO}_2$  as a catalyst (the molar ratio of Ru to sodium anilide is 1:10) at temperature 150 °C under the pressure of 70 bar of hydrogen.



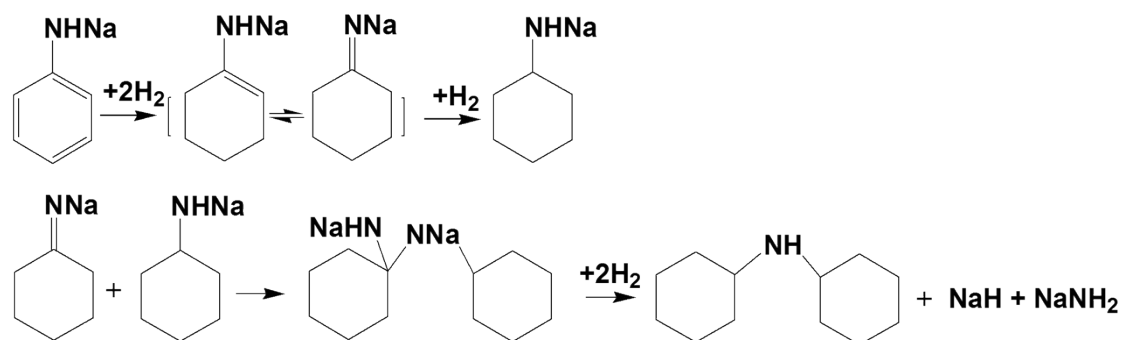

**Scheme S1.** Proposed hydrogenation pathways of sodium anilide.

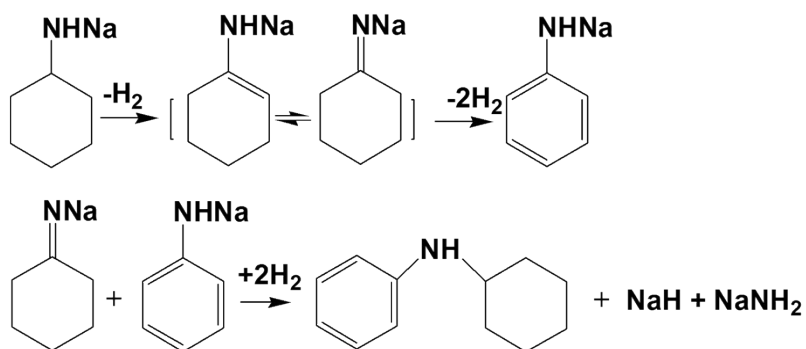

**Scheme S2.** Proposed dehydrogenation pathways of sodium cyclohexylamide.
